# Supplementary material for: What to Build for Middle-Agers to Come? Attractive and Necessary Functions of Exercise-Promotion Mobile Phone Apps: A Cross-Sectional Study
Source: PubMed Central journal article supplement (PMC5465381; doi:10.2196/mhealth.6233), 2017-05-25
Supplement: mhealth_v5i5e65_app2.pdf [file mhealth_v5i5e65_app2.pdf]

## Appendix 2: KANO analysis results.

This appendix details the analysis results with the KANO method. Specifically, The KANO method was conducted on participants with different characteristics and the analysis results are shown in Table 1 (the total sample), Table 2 (the high-PA sub-sample), Table3 (the medium-PA sub-sample), Table 4 (the low-PA sub-sample), Table 5 (the high-SSE sub-sample), Table 6 (the medium-SSE sub-sample), and Table 7 (the low-SSE sub-sample). The notation  $X(C_1, C_2, \dots, C_n)$  in the tables indicates a design feature had close proportions in the categories of  $C_i, 1 \leq i \leq n$ .

*Table 1. Categorizing design features according to total sample (n=103)*

| Design feature | Frequency of design feature |    |    |    |   |   | Category strength (%) | Total strength (%) | Classification results |
|----------------|-----------------------------|----|----|----|---|---|-----------------------|--------------------|------------------------|
|                | A                           | M  | O  | I  | R | Q |                       |                    |                        |
| A1             | 9                           | 30 | 9  | 52 | 2 | 1 | 21                    | 47                 | I                      |
| A2             | 12                          | 25 | 17 | 48 | 0 | 1 | 23                    | 52                 | I                      |
| A3             | 12                          | 9  | 4  | 69 | 7 | 2 | 55                    | 24                 | I                      |
| A4             | 8                           | 11 | 3  | 76 | 4 | 1 | 63                    | 21                 | I                      |
| A5             | 10                          | 20 | 18 | 52 | 1 | 2 | 31                    | 47                 | I                      |
| A6             | 13                          | 22 | 18 | 48 | 0 | 2 | 25                    | 52                 | I                      |
| A7             | 14                          | 21 | 21 | 42 | 4 | 1 | 20                    | 54                 | I                      |
| A8             | 21                          | 20 | 15 | 45 | 0 | 2 | 23                    | 54                 | I                      |
| A9             | 16                          | 26 | 12 | 48 | 0 | 1 | 21                    | 52                 | I                      |
| A10            | 17                          | 28 | 17 | 39 | 0 | 2 | 11                    | 60                 | I                      |
| A11            | 19                          | 19 | 14 | 50 | 0 | 1 | 30                    | 51                 | I                      |
| A12            | 13                          | 21 | 20 | 47 | 1 | 1 | 25                    | 52                 | I                      |
| A13            | 13                          | 24 | 21 | 43 | 0 | 2 | 18                    | 56                 | I                      |
| A14            | 14                          | 18 | 25 | 42 | 1 | 3 | 17                    | 55                 | I                      |
| A15            | 13                          | 25 | 21 | 41 | 0 | 3 | 16                    | 57                 | I                      |
| A16            | 17                          | 14 | 16 | 55 | 0 | 1 | 37                    | 46                 | I                      |
| A17            | 18                          | 15 | 16 | 53 | 0 | 1 | 34                    | 48                 | I                      |
| A18            | 21                          | 8  | 11 | 60 | 2 | 1 | 38                    | 39                 | I                      |
| A19            | 17                          | 9  | 13 | 62 | 1 | 1 | 44                    | 38                 | I                      |
| A20            | 21                          | 18 | 17 | 44 | 1 | 2 | 22                    | 54                 | I                      |
| A21            | 17                          | 21 | 21 | 40 | 1 | 3 | 18                    | 57                 | I                      |
| A22            | 17                          | 19 | 26 | 39 | 1 | 1 | 13                    | 60                 | I                      |
| A23            | 17                          | 18 | 27 | 37 | 2 | 2 | 10                    | 60                 | I                      |

---

|     |    |    |    |    |    |   |    |    |         |
|-----|----|----|----|----|----|---|----|----|---------|
| A24 | 21 | 16 | 16 | 47 | 1  | 2 | 25 | 52 | I       |
| A25 | 16 | 22 | 21 | 42 | 0  | 2 | 19 | 57 | I       |
| A26 | 12 | 24 | 23 | 42 | 0  | 2 | 18 | 57 | I       |
| A27 | 14 | 13 | 8  | 65 | 1  | 2 | 50 | 34 | I       |
| A28 | 24 | 16 | 14 | 46 | 1  | 2 | 21 | 52 | I       |
| A29 | 21 | 17 | 26 | 36 | 1  | 2 | 10 | 62 | I       |
| A30 | 28 | 15 | 23 | 33 | 1  | 3 | 5  | 64 | X(I, A) |
| A31 | 21 | 11 | 15 | 53 | 0  | 3 | 31 | 46 | I       |
| A32 | 26 | 11 | 15 | 48 | 1  | 2 | 21 | 51 | I       |
| A33 | 23 | 9  | 13 | 55 | 1  | 2 | 31 | 44 | I       |
| A34 | 23 | 10 | 14 | 53 | 1  | 2 | 29 | 46 | I       |
| A35 | 6  | 5  | 4  | 68 | 16 | 4 | 51 | 15 | I       |
| A36 | 13 | 8  | 14 | 64 | 2  | 2 | 49 | 34 | I       |
| A37 | 14 | 7  | 9  | 68 | 2  | 3 | 52 | 29 | I       |
| A38 | 18 | 7  | 7  | 64 | 5  | 2 | 45 | 31 | I       |
| A39 | 23 | 8  | 7  | 60 | 3  | 2 | 36 | 37 | I       |
| A40 | 18 | 6  | 6  | 68 | 3  | 2 | 49 | 29 | I       |
| A41 | 17 | 4  | 7  | 67 | 5  | 3 | 49 | 27 | I       |
| A42 | 12 | 6  | 11 | 70 | 3  | 1 | 56 | 28 | I       |
| A43 | 12 | 11 | 12 | 59 | 6  | 3 | 46 | 34 | I       |
| A44 | 21 | 14 | 12 | 54 | 1  | 1 | 32 | 46 | I       |
| A45 | 16 | 14 | 13 | 57 | 1  | 2 | 40 | 42 | I       |
| A46 | 21 | 12 | 13 | 54 | 1  | 2 | 32 | 45 | I       |
| A47 | 19 | 11 | 13 | 57 | 2  | 1 | 37 | 42 | I       |
| A48 | 13 | 9  | 12 | 67 | 1  | 1 | 52 | 33 | I       |
| A49 | 18 | 10 | 14 | 60 | 0  | 1 | 41 | 41 | I       |
| A50 | 22 | 11 | 12 | 56 | 0  | 2 | 33 | 44 | I       |
| A51 | 15 | 9  | 8  | 67 | 2  | 2 | 51 | 31 | I       |
| A52 | 21 | 21 | 20 | 40 | 0  | 1 | 18 | 60 | I       |

---

Table 2. Categorizing design features according to high level of physical activity (n=62)

| Design feature | Frequency of design feature |    |    |    |   |   | Category strength (%) | Total strength (%) | Classification results |
|----------------|-----------------------------|----|----|----|---|---|-----------------------|--------------------|------------------------|
|                | A                           | M  | O  | I  | R | Q |                       |                    |                        |
| A1             | 8                           | 14 | 4  | 35 | 1 | 0 | 34                    | 42                 | I                      |
| A2             | 8                           | 15 | 7  | 32 | 0 | 0 | 27                    | 48                 | I                      |
| A3             | 9                           | 5  | 4  | 40 | 4 | 0 | 50                    | 29                 | I                      |
| A4             | 4                           | 7  | 3  | 46 | 2 | 0 | 63                    | 23                 | I                      |
| A5             | 5                           | 10 | 8  | 37 | 1 | 1 | 44                    | 37                 | I                      |
| A6             | 9                           | 12 | 9  | 31 | 0 | 1 | 31                    | 48                 | I                      |
| A7             | 8                           | 13 | 10 | 29 | 2 | 0 | 26                    | 50                 | I                      |
| A8             | 11                          | 9  | 11 | 30 | 0 | 1 | 31                    | 50                 | I                      |
| A9             | 8                           | 14 | 8  | 32 | 0 | 0 | 29                    | 48                 | I                      |
| A10            | 10                          | 15 | 8  | 29 | 0 | 0 | 23                    | 53                 | I                      |
| A11            | 8                           | 12 | 9  | 33 | 0 | 0 | 34                    | 47                 | I                      |
| A12            | 5                           | 12 | 13 | 32 | 0 | 0 | 31                    | 48                 | I                      |
| A13            | 7                           | 11 | 14 | 29 | 0 | 1 | 24                    | 52                 | I                      |
| A14            | 8                           | 9  | 14 | 30 | 0 | 1 | 26                    | 50                 | I                      |
| A15            | 7                           | 14 | 12 | 28 | 0 | 1 | 23                    | 53                 | I                      |
| A16            | 9                           | 7  | 10 | 36 | 0 | 0 | 42                    | 42                 | I                      |
| A17            | 10                          | 9  | 9  | 34 | 0 | 0 | 39                    | 45                 | I                      |
| A18            | 10                          | 4  | 6  | 40 | 2 | 0 | 48                    | 32                 | I                      |
| A19            | 8                           | 5  | 6  | 42 | 1 | 0 | 55                    | 31                 | I                      |
| A20            | 13                          | 8  | 8  | 31 | 1 | 1 | 29                    | 47                 | I                      |
| A21            | 10                          | 10 | 10 | 30 | 1 | 1 | 32                    | 48                 | I                      |
| A22            | 8                           | 9  | 16 | 28 | 1 | 0 | 19                    | 53                 | I                      |
| A23            | 11                          | 9  | 14 | 26 | 1 | 1 | 19                    | 55                 | I                      |
| A24            | 12                          | 8  | 8  | 33 | 0 | 1 | 34                    | 45                 | I                      |
| A25            | 10                          | 10 | 12 | 29 | 0 | 1 | 27                    | 52                 | I                      |
| A26            | 7                           | 11 | 13 | 30 | 0 | 1 | 27                    | 50                 | I                      |
| A27            | 10                          | 8  | 3  | 39 | 1 | 1 | 47                    | 34                 | I                      |
| A28            | 15                          | 10 | 7  | 28 | 1 | 1 | 21                    | 52                 | I                      |
| A29            | 10                          | 9  | 15 | 26 | 1 | 1 | 18                    | 55                 | I                      |
| A30            | 16                          | 7  | 13 | 23 | 1 | 2 | 11                    | 58                 | I                      |
| A31            | 12                          | 6  | 8  | 34 | 0 | 2 | 36                    | 42                 | I                      |

---

|     |    |    |    |    |    |   |    |    |   |
|-----|----|----|----|----|----|---|----|----|---|
| A32 | 15 | 6  | 7  | 32 | 1  | 1 | 27 | 45 | I |
| A33 | 15 | 6  | 6  | 34 | 0  | 1 | 31 | 44 | I |
| A34 | 13 | 7  | 8  | 32 | 1  | 1 | 31 | 45 | I |
| A35 | 3  | 4  | 2  | 40 | 10 | 3 | 48 | 15 | I |
| A36 | 7  | 6  | 8  | 38 | 2  | 1 | 48 | 34 | I |
| A37 | 8  | 5  | 4  | 43 | 1  | 1 | 57 | 27 | I |
| A38 | 10 | 5  | 4  | 38 | 4  | 1 | 45 | 31 | I |
| A39 | 12 | 5  | 3  | 39 | 2  | 1 | 44 | 32 | I |
| A40 | 12 | 4  | 2  | 40 | 3  | 1 | 45 | 29 | I |
| A41 | 9  | 3  | 4  | 41 | 3  | 2 | 52 | 26 | I |
| A42 | 5  | 5  | 7  | 43 | 2  | 0 | 58 | 27 | I |
| A43 | 7  | 7  | 7  | 35 | 5  | 1 | 45 | 34 | I |
| A44 | 11 | 9  | 7  | 34 | 1  | 0 | 37 | 44 | I |
| A45 | 8  | 9  | 7  | 37 | 1  | 0 | 45 | 39 | I |
| A46 | 12 | 9  | 6  | 34 | 1  | 0 | 36 | 44 | I |
| A47 | 11 | 9  | 7  | 33 | 2  | 0 | 36 | 44 | I |
| A48 | 7  | 7  | 6  | 41 | 1  | 0 | 55 | 32 | I |
| A49 | 11 | 8  | 6  | 37 | 0  | 0 | 42 | 40 | I |
| A50 | 12 | 9  | 5  | 35 | 0  | 1 | 37 | 42 | I |
| A51 | 9  | 7  | 5  | 38 | 2  | 1 | 47 | 34 | I |
| A52 | 11 | 12 | 12 | 27 | 0  | 0 | 24 | 57 | I |

---

Table 3. Categorizing design features according to medium level of physical activity (n=18)

| Design feature | Frequency of design feature |   |   |    |   |   | Category strength (%) | Total strength (%) | Classification results |
|----------------|-----------------------------|---|---|----|---|---|-----------------------|--------------------|------------------------|
|                | A                           | M | O | I  | R | Q |                       |                    |                        |
| A1             | 0                           | 5 | 3 | 9  | 1 | 0 | 22                    | 44                 | I                      |
| A2             | 2                           | 2 | 6 | 8  | 0 | 0 | 11                    | 56                 | I                      |
| A3             | 0                           | 3 | 0 | 14 | 1 | 0 | 61                    | 17                 | I                      |
| A4             | 0                           | 2 | 0 | 14 | 2 | 0 | 67                    | 11                 | I                      |
| A5             | 4                           | 3 | 5 | 6  | 0 | 0 | 6                     | 67                 | X(I,O)                 |
| A6             | 2                           | 3 | 4 | 9  | 0 | 0 | 28                    | 50                 | I                      |
| A7             | 3                           | 2 | 4 | 8  | 1 | 0 | 22                    | 50                 | I                      |
| A8             | 6                           | 4 | 0 | 8  | 0 | 0 | 11                    | 56                 | I                      |
| A9             | 5                           | 5 | 0 | 8  | 0 | 0 | 17                    | 56                 | I                      |
| A10            | 4                           | 7 | 2 | 5  | 0 | 0 | 11                    | 72                 | M                      |
| A11            | 6                           | 5 | 1 | 6  | 0 | 0 | 0                     | 67                 | X(A,I)                 |
| A12            | 3                           | 3 | 2 | 10 | 0 | 0 | 39                    | 44                 | I                      |
| A13            | 3                           | 5 | 2 | 8  | 0 | 0 | 17                    | 56                 | I                      |
| A14            | 3                           | 3 | 3 | 9  | 0 | 0 | 33                    | 50                 | I                      |
| A15            | 2                           | 4 | 2 | 10 | 0 | 0 | 33                    | 44                 | I                      |
| A16            | 4                           | 4 | 1 | 9  | 0 | 0 | 28                    | 50                 | I                      |
| A17            | 3                           | 2 | 2 | 11 | 0 | 0 | 44                    | 39                 | I                      |
| A18            | 3                           | 2 | 2 | 11 | 0 | 0 | 44                    | 39                 | I                      |
| A19            | 3                           | 2 | 3 | 10 | 0 | 0 | 39                    | 44                 | I                      |
| A20            | 4                           | 5 | 3 | 6  | 0 | 0 | 6                     | 67                 | X(I,M)                 |
| A21            | 3                           | 4 | 4 | 7  | 0 | 0 | 17                    | 61                 | I                      |
| A22            | 4                           | 2 | 4 | 8  | 0 | 0 | 22                    | 56                 | I                      |
| A23            | 2                           | 3 | 6 | 7  | 0 | 0 | 6                     | 61                 | X(I, O)                |
| A24            | 3                           | 2 | 4 | 8  | 1 | 0 | 22                    | 50                 | I                      |
| A25            | 2                           | 4 | 4 | 8  | 0 | 0 | 22                    | 56                 | I                      |
| A26            | 1                           | 4 | 5 | 8  | 0 | 0 | 17                    | 56                 | I                      |
| A27            | 1                           | 2 | 3 | 12 | 0 | 0 | 50                    | 33                 | I                      |
| A28            | 3                           | 2 | 4 | 9  | 0 | 0 | 28                    | 50                 | I                      |
| A29            | 4                           | 1 | 6 | 7  | 0 | 0 | 6                     | 61                 | X(I, O)                |
| A30            | 5                           | 1 | 5 | 7  | 0 | 0 | 11                    | 61                 | I                      |
| A31            | 4                           | 2 | 3 | 9  | 0 | 0 | 28                    | 50                 | I                      |
| A32            | 5                           | 2 | 3 | 8  | 0 | 0 | 17                    | 56                 | I                      |
| A33            | 4                           | 2 | 3 | 9  | 0 | 0 | 28                    | 50                 | I                      |

---

|     |   |   |   |    |   |   |    |    |   |
|-----|---|---|---|----|---|---|----|----|---|
| A34 | 4 | 2 | 3 | 9  | 0 | 0 | 28 | 50 | I |
| A35 | 1 | 0 | 1 | 14 | 2 | 0 | 67 | 11 | I |
| A36 | 2 | 2 | 3 | 11 | 0 | 0 | 44 | 39 | I |
| A37 | 3 | 2 | 2 | 10 | 1 | 0 | 39 | 39 | I |
| A38 | 2 | 2 | 2 | 12 | 0 | 0 | 56 | 33 | I |
| A39 | 3 | 1 | 3 | 11 | 0 | 0 | 44 | 39 | I |
| A40 | 1 | 1 | 3 | 13 | 0 | 0 | 56 | 28 | I |
| A41 | 3 | 1 | 2 | 11 | 1 | 0 | 44 | 33 | I |
| A42 | 2 | 1 | 2 | 13 | 0 | 0 | 61 | 28 | I |
| A43 | 3 | 2 | 3 | 10 | 0 | 0 | 39 | 44 | I |
| A44 | 3 | 2 | 3 | 10 | 0 | 0 | 39 | 44 | I |
| A45 | 3 | 3 | 3 | 9  | 0 | 0 | 33 | 50 | I |
| A46 | 3 | 2 | 3 | 10 | 0 | 0 | 39 | 44 | I |
| A47 | 3 | 1 | 3 | 11 | 0 | 0 | 44 | 39 | I |
| A48 | 2 | 1 | 3 | 12 | 0 | 0 | 50 | 33 | I |
| A49 | 3 | 1 | 4 | 10 | 0 | 0 | 33 | 44 | I |
| A50 | 5 | 1 | 3 | 9  | 0 | 0 | 22 | 50 | I |
| A51 | 3 | 1 | 2 | 12 | 0 | 0 | 50 | 33 | I |
| A52 | 4 | 2 | 5 | 7  | 0 | 0 | 11 | 61 | I |

---

**X(C1, C2): indicates an attribute had close proportions in two categories of C1 and C2.**

Table 4. Categorizing design features according to low level of physical activity (n=22)

| Design feature | Frequency of design feature |    |   |    |   |   | Category strength (%) | Total strength (%) | Classification results |
|----------------|-----------------------------|----|---|----|---|---|-----------------------|--------------------|------------------------|
|                | A                           | M  | O | I  | R | Q |                       |                    |                        |
| A1             | 1                           | 11 | 2 | 8  | 0 | 0 | 14                    | 64                 | M                      |
| A2             | 1                           | 8  | 4 | 8  | 0 | 1 | 0                     | 59                 | M                      |
| A3             | 2                           | 1  | 0 | 15 | 2 | 2 | 59                    | 14                 | I                      |
| A4             | 4                           | 2  | 0 | 16 | 0 | 0 | 55                    | 27                 | I                      |
| A5             | 1                           | 7  | 5 | 9  | 0 | 0 | 9                     | 59                 | I                      |
| A6             | 2                           | 7  | 5 | 8  | 0 | 0 | 5                     | 64                 | X(I,M)                 |
| A7             | 3                           | 6  | 7 | 5  | 1 | 0 | 5                     | 73                 | X(O,M)                 |
| A8             | 4                           | 7  | 4 | 7  | 0 | 0 | 0                     | 68                 | X(M,I)                 |
| A9             | 3                           | 7  | 4 | 8  | 0 | 0 | 5                     | 64                 | X(I,M)                 |
| A10            | 3                           | 6  | 7 | 5  | 0 | 1 | 5                     | 73                 | X(O,M)                 |
| A11            | 5                           | 2  | 4 | 11 | 0 | 0 | 27                    | 50                 | I                      |
| A12            | 5                           | 6  | 5 | 5  | 1 | 0 | 5                     | 73                 | X(M,A,O,I)             |
| A13            | 3                           | 8  | 5 | 6  | 0 | 0 | 9                     | 73                 | M                      |
| A14            | 3                           | 6  | 8 | 3  | 1 | 1 | 9                     | 77                 | O                      |
| A15            | 4                           | 7  | 7 | 3  | 0 | 1 | 0                     | 82                 | X(M,O)                 |
| A16            | 4                           | 3  | 5 | 10 | 0 | 0 | 23                    | 55                 | I                      |
| A17            | 5                           | 4  | 5 | 8  | 0 | 0 | 14                    | 64                 | I                      |
| A18            | 8                           | 2  | 3 | 9  | 0 | 0 | 5                     | 59                 | I                      |
| A19            | 6                           | 2  | 4 | 10 | 0 | 0 | 18                    | 55                 | I                      |
| A20            | 4                           | 5  | 6 | 7  | 0 | 0 | 5                     | 68                 | X(I,O)                 |
| A21            | 4                           | 7  | 7 | 3  | 0 | 1 | 0                     | 82                 | X(M,O)                 |
| A22            | 5                           | 8  | 6 | 3  | 0 | 0 | 9                     | 86                 | M                      |
| A23            | 4                           | 6  | 7 | 4  | 1 | 0 | 5                     | 77                 | X(O,M)                 |
| A24            | 6                           | 6  | 4 | 6  | 0 | 0 | 0                     | 73                 | X(A,M,I)               |
| A25            | 4                           | 8  | 5 | 5  | 0 | 0 | 14                    | 77                 | M                      |
| A26            | 4                           | 9  | 5 | 4  | 0 | 0 | 18                    | 82                 | M                      |
| A27            | 3                           | 3  | 2 | 14 | 0 | 0 | 50                    | 36                 | I                      |
| A28            | 6                           | 4  | 3 | 9  | 0 | 0 | 14                    | 59                 | I                      |
| A29            | 7                           | 7  | 5 | 3  | 0 | 0 | 0                     | 86                 | X(A,M)                 |
| A30            | 7                           | 7  | 5 | 3  | 0 | 0 | 0                     | 86                 | X(A,M)                 |
| A31            | 5                           | 3  | 4 | 10 | 0 | 0 | 23                    | 55                 | I                      |
| A32            | 6                           | 3  | 5 | 8  | 0 | 0 | 9                     | 64                 | I                      |
| A33            | 4                           | 1  | 4 | 12 | 1 | 0 | 36                    | 41                 | I                      |

---

|     |   |   |   |    |   |   |    |    |          |
|-----|---|---|---|----|---|---|----|----|----------|
| A34 | 6 | 1 | 3 | 12 | 0 | 0 | 27 | 45 | I        |
| A35 | 2 | 1 | 1 | 14 | 4 | 0 | 45 | 18 | I        |
| A36 | 4 | 0 | 3 | 15 | 0 | 0 | 50 | 32 | I        |
| A37 | 3 | 0 | 3 | 15 | 0 | 1 | 55 | 27 | I        |
| A38 | 6 | 0 | 1 | 14 | 1 | 0 | 36 | 32 | I        |
| A39 | 8 | 2 | 1 | 10 | 1 | 0 | 9  | 50 | I        |
| A40 | 5 | 1 | 1 | 15 | 0 | 0 | 45 | 32 | I        |
| A41 | 5 | 0 | 1 | 15 | 1 | 0 | 45 | 27 | I        |
| A42 | 5 | 0 | 2 | 14 | 1 | 0 | 41 | 32 | I        |
| A43 | 2 | 2 | 2 | 14 | 1 | 1 | 55 | 27 | I        |
| A44 | 7 | 3 | 2 | 10 | 0 | 0 | 14 | 55 | I        |
| A45 | 5 | 2 | 3 | 11 | 0 | 1 | 27 | 45 | I        |
| A46 | 6 | 1 | 4 | 10 | 0 | 1 | 18 | 50 | I        |
| A47 | 5 | 1 | 3 | 13 | 0 | 0 | 36 | 41 | I        |
| A48 | 4 | 1 | 3 | 14 | 0 | 0 | 45 | 36 | I        |
| A49 | 4 | 1 | 4 | 13 | 0 | 0 | 41 | 41 | I        |
| A50 | 5 | 1 | 4 | 12 | 0 | 0 | 32 | 45 | I        |
| A51 | 3 | 1 | 1 | 17 | 0 | 0 | 64 | 23 | I        |
| A52 | 6 | 7 | 3 | 6  | 0 | 0 | 5  | 73 | X(M,A,I) |

---



Table 5. Categorizing design features according to high self-efficacy (n=35)

| Design feature | Frequency of design feature |    |    |    |   |   | Category strength (%) | Total strength (%) | Classification results |
|----------------|-----------------------------|----|----|----|---|---|-----------------------|--------------------|------------------------|
|                | A                           | M  | O  | I  | R | Q |                       |                    |                        |
| A1             | 2                           | 12 | 4  | 15 | 1 | 1 | 9                     | 51                 | I                      |
| A2             | 6                           | 10 | 7  | 11 | 0 | 1 | 3                     | 66                 | X(I,M)                 |
| A3             | 7                           | 4  | 3  | 17 | 3 | 1 | 29                    | 40                 | I                      |
| A4             | 3                           | 4  | 1  | 24 | 2 | 1 | 57                    | 23                 | I                      |
| A5             | 5                           | 8  | 6  | 14 | 0 | 2 | 17                    | 54                 | I                      |
| A6             | 6                           | 7  | 8  | 13 | 0 | 1 | 14                    | 60                 | I                      |
| A7             | 5                           | 7  | 9  | 12 | 1 | 1 | 9                     | 60                 | I                      |
| A8             | 8                           | 6  | 8  | 12 | 0 | 1 | 11                    | 63                 | I                      |
| A9             | 5                           | 9  | 7  | 13 | 0 | 1 | 11                    | 60                 | I                      |
| A10            | 6                           | 10 | 8  | 10 | 0 | 1 | 0                     | 69                 | X(M,I)                 |
| A11            | 5                           | 8  | 5  | 16 | 0 | 1 | 23                    | 51                 | I                      |
| A12            | 6                           | 5  | 11 | 12 | 0 | 1 | 3                     | 63                 | X(I,O)                 |
| A13            | 7                           | 7  | 10 | 9  | 0 | 2 | 3                     | 69                 | X(O,I)                 |
| A14            | 6                           | 6  | 11 | 10 | 0 | 2 | 3                     | 66                 | X(O,I)                 |
| A15            | 5                           | 8  | 10 | 10 | 0 | 2 | 0                     | 66                 | X(O,I)                 |
| A16            | 6                           | 4  | 10 | 14 | 0 | 1 | 11                    | 57                 | I                      |
| A17            | 7                           | 4  | 10 | 13 | 0 | 1 | 9                     | 60                 | I                      |
| A18            | 7                           | 0  | 7  | 19 | 1 | 1 | 34                    | 40                 | I                      |
| A19            | 6                           | 3  | 7  | 18 | 0 | 1 | 31                    | 46                 | I                      |
| A20            | 9                           | 4  | 7  | 13 | 0 | 2 | 11                    | 57                 | I                      |
| A21            | 7                           | 5  | 10 | 11 | 0 | 2 | 3                     | 63                 | X(I,O)                 |
| A22            | 4                           | 3  | 14 | 12 | 1 | 1 | 6                     | 60                 | X(O,I)                 |
| A23            | 6                           | 3  | 14 | 10 | 0 | 2 | 11                    | 66                 | O                      |
| A24            | 9                           | 3  | 8  | 13 | 0 | 2 | 11                    | 57                 | I                      |
| A25            | 6                           | 4  | 12 | 11 | 0 | 2 | 3                     | 63                 | X(O,I)                 |
| A26            | 5                           | 6  | 13 | 9  | 0 | 2 | 11                    | 69                 | O                      |
| A27            | 7                           | 4  | 4  | 18 | 0 | 2 | 31                    | 43                 | I                      |
| A28            | 10                          | 4  | 5  | 13 | 1 | 2 | 9                     | 54                 | I                      |
| A29            | 7                           | 3  | 15 | 8  | 0 | 2 | 20                    | 71                 | O                      |
| A30            | 9                           | 3  | 13 | 7  | 1 | 2 | 11                    | 71                 | O                      |
| A31            | 8                           | 4  | 7  | 13 | 0 | 3 | 14                    | 54                 | I                      |

---

|     |    |   |    |    |   |   |    |    |        |
|-----|----|---|----|----|---|---|----|----|--------|
| A32 | 10 | 3 | 8  | 12 | 0 | 2 | 6  | 60 | I      |
| A33 | 7  | 2 | 8  | 16 | 0 | 2 | 23 | 49 | I      |
| A34 | 7  | 3 | 7  | 15 | 1 | 2 | 23 | 49 | I      |
| A35 | 4  | 2 | 3  | 17 | 7 | 2 | 29 | 26 | I      |
| A36 | 5  | 2 | 7  | 18 | 1 | 2 | 31 | 40 | I      |
| A37 | 4  | 1 | 5  | 22 | 1 | 2 | 49 | 29 | I      |
| A38 | 9  | 1 | 4  | 19 | 0 | 2 | 29 | 40 | I      |
| A39 | 9  | 1 | 3  | 19 | 1 | 2 | 29 | 37 | I      |
| A40 | 9  | 1 | 3  | 19 | 2 | 1 | 29 | 37 | I      |
| A41 | 8  | 0 | 4  | 19 | 2 | 2 | 31 | 34 | I      |
| A42 | 6  | 1 | 5  | 21 | 1 | 1 | 43 | 34 | I      |
| A43 | 5  | 2 | 5  | 19 | 3 | 1 | 40 | 34 | I      |
| A44 | 7  | 5 | 7  | 14 | 1 | 1 | 20 | 54 | I      |
| A45 | 6  | 4 | 6  | 17 | 1 | 1 | 31 | 46 | I      |
| A46 | 8  | 3 | 6  | 16 | 1 | 1 | 23 | 49 | I      |
| A47 | 7  | 1 | 5  | 21 | 0 | 1 | 40 | 37 | I      |
| A48 | 6  | 0 | 5  | 22 | 1 | 1 | 46 | 31 | I      |
| A49 | 9  | 1 | 5  | 19 | 0 | 1 | 29 | 43 | I      |
| A50 | 9  | 1 | 4  | 19 | 0 | 2 | 29 | 40 | I      |
| A51 | 6  | 1 | 4  | 21 | 1 | 2 | 43 | 31 | I      |
| A52 | 6  | 6 | 10 | 12 | 0 | 1 | 6  | 63 | X(I,0) |

---

Table 6. Categorizing design features according to medium self-efficacy (n=32)

| Design feature | Frequency of design feature |    |   |    |   |   | Category strength (%) | Total strength (%) | Classification results |
|----------------|-----------------------------|----|---|----|---|---|-----------------------|--------------------|------------------------|
|                | A                           | M  | O | I  | R | Q |                       |                    |                        |
| A1             | 3                           | 13 | 1 | 15 | 0 | 0 | 6                     | 53                 | I                      |
| A2             | 2                           | 10 | 2 | 18 | 0 | 0 | 25                    | 44                 | I                      |
| A3             | 1                           | 3  | 0 | 26 | 1 | 1 | 72                    | 13                 | I                      |
| A4             | 2                           | 3  | 1 | 25 | 1 | 0 | 69                    | 19                 | I                      |
| A5             | 1                           | 9  | 4 | 17 | 1 | 0 | 25                    | 44                 | I                      |
| A6             | 3                           | 12 | 3 | 14 | 0 | 0 | 6                     | 56                 | I                      |
| A7             | 3                           | 11 | 4 | 13 | 1 | 0 | 6                     | 56                 | I                      |
| A8             | 3                           | 10 | 2 | 16 | 0 | 1 | 19                    | 47                 | I                      |
| A9             | 3                           | 11 | 2 | 16 | 0 | 0 | 16                    | 50                 | I                      |
| A10            | 2                           | 12 | 3 | 14 | 0 | 1 | 6                     | 53                 | I                      |
| A11            | 4                           | 7  | 5 | 16 | 0 | 0 | 28                    | 50                 | I                      |
| A12            | 2                           | 10 | 4 | 15 | 1 | 0 | 16                    | 50                 | I                      |
| A13            | 1                           | 12 | 4 | 15 | 0 | 0 | 9                     | 53                 | I                      |
| A14            | 3                           | 6  | 7 | 15 | 1 | 0 | 25                    | 50                 | I                      |
| A15            | 3                           | 12 | 4 | 12 | 0 | 1 | 0                     | 59                 | M                      |
| A16            | 6                           | 5  | 2 | 19 | 0 | 0 | 41                    | 41                 | I                      |
| A17            | 5                           | 6  | 2 | 19 | 0 | 0 | 41                    | 41                 | I                      |
| A18            | 6                           | 5  | 1 | 19 | 1 | 0 | 41                    | 38                 | I                      |
| A19            | 7                           | 4  | 2 | 18 | 1 | 0 | 34                    | 41                 | I                      |
| A20            | 5                           | 10 | 4 | 13 | 0 | 0 | 9                     | 59                 | I                      |
| A21            | 5                           | 10 | 3 | 12 | 1 | 1 | 6                     | 56                 | I                      |
| A22            | 7                           | 12 | 5 | 8  | 0 | 0 | 13                    | 75                 | M                      |
| A23            | 6                           | 10 | 4 | 10 | 2 | 0 | 0                     | 63                 | X(M,I)                 |
| A24            | 5                           | 10 | 3 | 14 | 0 | 0 | 13                    | 56                 | I                      |
| A25            | 6                           | 13 | 3 | 10 | 0 | 0 | 9                     | 69                 | M                      |
| A26            | 4                           | 13 | 3 | 12 | 0 | 0 | 3                     | 63                 | X(M,I)                 |
| A27            | 3                           | 7  | 1 | 20 | 1 | 0 | 41                    | 34                 | I                      |
| A28            | 5                           | 8  | 3 | 16 | 0 | 0 | 25                    | 50                 | I                      |
| A29            | 5                           | 10 | 5 | 12 | 0 | 0 | 6                     | 63                 | I                      |
| A30            | 7                           | 8  | 3 | 13 | 0 | 1 | 16                    | 56                 | I                      |
| A31            | 6                           | 5  | 4 | 17 | 0 | 0 | 34                    | 47                 | I                      |
| A32            | 7                           | 5  | 2 | 18 | 0 | 0 | 34                    | 44                 | I                      |
| A33            | 9                           | 5  | 2 | 15 | 1 | 0 | 19                    | 50                 | I                      |

---

|     |   |    |   |    |   |   |    |    |   |
|-----|---|----|---|----|---|---|----|----|---|
| A34 | 7 | 5  | 3 | 17 | 0 | 0 | 31 | 47 | I |
| A35 | 0 | 2  | 0 | 26 | 3 | 1 | 72 | 6  | I |
| A36 | 3 | 5  | 3 | 21 | 0 | 0 | 50 | 34 | I |
| A37 | 5 | 5  | 2 | 19 | 0 | 1 | 44 | 38 | I |
| A38 | 4 | 4  | 1 | 21 | 2 | 0 | 53 | 28 | I |
| A39 | 5 | 5  | 1 | 20 | 1 | 0 | 47 | 34 | I |
| A40 | 4 | 4  | 0 | 23 | 1 | 0 | 59 | 25 | I |
| A41 | 3 | 3  | 0 | 23 | 2 | 1 | 63 | 19 | I |
| A42 | 3 | 4  | 2 | 22 | 1 | 0 | 56 | 28 | I |
| A43 | 2 | 6  | 3 | 20 | 0 | 1 | 44 | 34 | I |
| A44 | 7 | 7  | 1 | 17 | 0 | 0 | 31 | 47 | I |
| A45 | 5 | 9  | 2 | 15 | 0 | 1 | 19 | 50 | I |
| A46 | 6 | 6  | 2 | 18 | 0 | 0 | 38 | 44 | I |
| A47 | 3 | 7  | 4 | 16 | 2 | 0 | 28 | 44 | I |
| A48 | 3 | 7  | 2 | 20 | 0 | 0 | 41 | 38 | I |
| A49 | 4 | 7  | 3 | 18 | 0 | 0 | 34 | 44 | I |
| A50 | 7 | 6  | 2 | 17 | 0 | 0 | 31 | 47 | I |
| A51 | 4 | 5  | 1 | 21 | 1 | 0 | 50 | 31 | I |
| A52 | 7 | 12 | 3 | 10 | 0 | 0 | 6  | 69 | M |

---

Table 7. Categorizing design features according to low self-efficacy(n=35)

| Design feature | Frequency of design feature |   |   |    |   |   | Category strength (%) | Total strength (%) | Classification results |
|----------------|-----------------------------|---|---|----|---|---|-----------------------|--------------------|------------------------|
|                | A                           | M | O | I  | R | Q |                       |                    |                        |
| A1             | 4                           | 5 | 4 | 21 | 1 | 0 | 46                    | 37                 | I                      |
| A2             | 4                           | 5 | 8 | 18 | 0 | 0 | 29                    | 49                 | I                      |
| A3             | 4                           | 2 | 1 | 25 | 3 | 0 | 60                    | 20                 | I                      |
| A4             | 3                           | 4 | 1 | 26 | 1 | 0 | 63                    | 23                 | I                      |
| A5             | 4                           | 3 | 8 | 20 | 0 | 0 | 34                    | 43                 | I                      |
| A6             | 4                           | 3 | 7 | 20 | 0 | 1 | 37                    | 40                 | I                      |
| A7             | 6                           | 3 | 8 | 16 | 2 | 0 | 23                    | 49                 | I                      |
| A8             | 10                          | 4 | 5 | 16 | 0 | 0 | 17                    | 54                 | I                      |
| A9             | 8                           | 6 | 3 | 18 | 0 | 0 | 29                    | 49                 | I                      |
| A10            | 9                           | 6 | 6 | 14 | 0 | 0 | 14                    | 60                 | I                      |
| A11            | 10                          | 4 | 4 | 17 | 0 | 0 | 20                    | 51                 | I                      |
| A12            | 5                           | 6 | 5 | 19 | 0 | 0 | 37                    | 46                 | I                      |
| A13            | 5                           | 5 | 7 | 18 | 0 | 0 | 31                    | 49                 | I                      |
| A14            | 5                           | 6 | 7 | 16 | 0 | 1 | 26                    | 51                 | I                      |
| A15            | 5                           | 5 | 7 | 18 | 0 | 0 | 31                    | 49                 | I                      |
| A16            | 5                           | 5 | 4 | 21 | 0 | 0 | 46                    | 40                 | I                      |
| A17            | 6                           | 5 | 4 | 20 | 0 | 0 | 40                    | 43                 | I                      |
| A18            | 8                           | 3 | 3 | 21 | 0 | 0 | 37                    | 40                 | I                      |
| A19            | 4                           | 2 | 4 | 25 | 0 | 0 | 60                    | 29                 | I                      |
| A20            | 7                           | 4 | 6 | 17 | 1 | 0 | 29                    | 49                 | I                      |
| A21            | 5                           | 6 | 8 | 16 | 0 | 0 | 23                    | 54                 | I                      |
| A22            | 6                           | 4 | 7 | 18 | 0 | 0 | 31                    | 49                 | I                      |
| A23            | 5                           | 5 | 9 | 16 | 0 | 0 | 20                    | 54                 | I                      |
| A24            | 7                           | 3 | 5 | 19 | 1 | 0 | 34                    | 43                 | I                      |
| A25            | 4                           | 5 | 6 | 20 | 0 | 0 | 40                    | 43                 | I                      |
| A26            | 3                           | 5 | 7 | 20 | 0 | 0 | 37                    | 43                 | I                      |
| A27            | 4                           | 2 | 3 | 26 | 0 | 0 | 63                    | 26                 | I                      |
| A28            | 9                           | 4 | 6 | 16 | 0 | 0 | 20                    | 54                 | I                      |
| A29            | 9                           | 4 | 6 | 15 | 1 | 0 | 17                    | 54                 | I                      |
| A30            | 12                          | 4 | 7 | 12 | 0 | 0 | 0                     | 66                 | X(A,I)                 |
| A31            | 7                           | 2 | 4 | 22 | 0 | 0 | 43                    | 37                 | I                      |
| A32            | 9                           | 3 | 5 | 17 | 1 | 0 | 23                    | 49                 | I                      |
| A33            | 7                           | 2 | 3 | 23 | 0 | 0 | 46                    | 34                 | I                      |

---

|     |   |   |   |    |   |   |    |    |   |
|-----|---|---|---|----|---|---|----|----|---|
| A34 | 9 | 2 | 4 | 20 | 0 | 0 | 31 | 43 | I |
| A35 | 2 | 1 | 1 | 24 | 6 | 1 | 51 | 11 | I |
| A36 | 5 | 1 | 4 | 24 | 1 | 0 | 54 | 29 | I |
| A37 | 5 | 1 | 2 | 26 | 1 | 0 | 60 | 23 | I |
| A38 | 5 | 2 | 2 | 23 | 3 | 0 | 51 | 26 | I |
| A39 | 9 | 2 | 3 | 20 | 1 | 0 | 31 | 40 | I |
| A40 | 5 | 1 | 3 | 25 | 0 | 1 | 57 | 26 | I |
| A41 | 6 | 1 | 3 | 24 | 1 | 0 | 51 | 29 | I |
| A42 | 3 | 1 | 4 | 26 | 1 | 0 | 63 | 23 | I |
| A43 | 5 | 3 | 4 | 19 | 3 | 1 | 40 | 34 | I |
| A44 | 7 | 2 | 4 | 22 | 0 | 0 | 43 | 37 | I |
| A45 | 5 | 1 | 5 | 24 | 0 | 0 | 54 | 31 | I |
| A46 | 7 | 3 | 5 | 19 | 0 | 1 | 34 | 43 | I |
| A47 | 9 | 3 | 4 | 19 | 0 | 0 | 29 | 46 | I |
| A48 | 4 | 2 | 5 | 24 | 0 | 0 | 54 | 31 | I |
| A49 | 5 | 2 | 6 | 22 | 0 | 0 | 46 | 37 | I |
| A50 | 6 | 4 | 6 | 19 | 0 | 0 | 37 | 46 | I |
| A51 | 5 | 3 | 3 | 24 | 0 | 0 | 54 | 31 | I |
| A52 | 8 | 3 | 7 | 17 | 0 | 0 | 26 | 51 | I |

---
