# Supplementary material for: What to Build for Middle-Agers to Come? Attractive and Necessary Functions of Exercise-Promotion Mobile Phone Apps: A Cross-Sectional Study
Source: PubMed Central journal article supplement (PMC5465381; doi:10.2196/mhealth.6233), 2017-05-25
Supplement: mhealth_v5i5e65_app3.pdf [file mhealth_v5i5e65_app3.pdf]

Appendix 3: Model fitting information and the results of likelihood ratio tests

|                  | Model fitting             |      |                            |      | Likelihood Ratio Test                |      |                            |      |
|------------------|---------------------------|------|----------------------------|------|--------------------------------------|------|----------------------------|------|
|                  |                           |      |                            |      | Smartphone Self-Efficacy             |      | Level of Physical Activity |      |
|                  | $\chi^2_{\text{Pearson}}$ | Sig. | $\chi^2_{\text{Deviance}}$ | Sig. | $\chi^2$                             | Sig. | $\chi^2$                   | Sig. |
| A1               | 10.090 (df=8)             | .26  | 11.751 (df=8)              | .16  | 6.033 (df=4)                         | .20  | 4.428 (df=4)               | .35  |
| A2               | 9.875 (df=8)              | .27  | 11.667 (df=8)              | .17  | 7.881 (df=4)                         | .10  | 4.081 (df=4)               | .40  |
| A3               | 3.566 (df=8)              | .89  | 5.088 (df=8)               | .75  | 10.172 (df=4)                        | .04  | 10.625 (df=4)              | .03  |
| A4               | 6.706 (df=8)              | .57  | 8.271 (df=8)               | .41  | 0.494 (df=4)                         | .97  | 5.501 (df=4)               | .24  |
| A5               | 8.375 (df=8)              | .40  | 8.643 (df=8)               | .37  | 6.568 (df=4)                         | .16  | 7.567 (df=4)               | .11  |
| A6               | 9.213 (df=8)              | .33  | 12.027 (df=8)              | .15  | 10.431 (df=4)                        | .03  | 1.244 (df=4)               | .87  |
| A7               | 10.946 (df=8)             | .21  | 13.891 (df=8)              | .09  | 8.164 (df=4)                         | .09  | 4.232 (df=4)               | .38  |
| A8               | 5.980 (df=8)              | .65  | 6.253 (df=8)               | .62  | 10.605 (df=4)                        | .03  | 3.349 (df=4)               | .50  |
| A9               | 7.866 (df=8)              | .45  | 8.290 (df=8)               | .41  | 5.588 (df=4)                         | .23  | 1.460 (df=4)               | .83  |
| A10              | 9.868 (df=8)              | .27  | 11.994 (df=8)              | .15  | 10.418 (df=4)                        | .03  | 5.490 (df=4)               | .24  |
| A11              | 3.562 (df=8)              | .89  | 3.772 (df=8)               | .88  | 3.348 (df=4)                         | .50  | 5.051 (df=4)               | .28  |
| A12              | 5.487 (df=8)              | .70  | 7.432 (df=8)               | .49  | 8.905 (df=4)                         | .06  | 4.405 (df=4)               | .35  |
| A13              | 4.059 (df=8)              | .85  | 4.356 (df=8)               | .82  | 12.168 (df=4)                        | .02  | 4.103 (df=4)               | .39  |
| A14              | 4.017 (df=8)              | .86  | 4.527 (df=8)               | .81  | 3.380 (df=4)                         | .50  | 5.560 (df=4)               | .24  |
| A15              | 4.730 (df=8)              | .79  | 4.999 (df=8)               | .76  | 7.551 (df=4)                         | .11  | 7.523 (df=4)               | .11  |
| A16              | 9.989 (df=8)              | .27  | 11.360 (df=8)              | .18  | 4.766 (df=4)                         | .31  | 2.113 (df=4)               | .72  |
| A17              | 11.027 (df=8)             | .20  | 13.712 (df=8)              | .09  | 6.677 (df=4)                         | .15  | 3.091 (df=4)               | .54  |
| A18              | 4.482 (df=8)              | .81  | 4.352 (df=8)               | .82  | 9.808 (df=4)                         | .04  | 5.615 (df=4)               | .23  |
| A19              | 8.280 (df=8)              | .41  | 8.871 (df=8)               | .35  | 3.042 (df=4)                         | .55  | 4.234 (df=4)               | .38  |
| A20 <sup>a</sup> | 13.598 (df=8)             | .09  | 15.569 (df=8)              | .049 | Excluded from the predictor analysis |      |                            |      |
| A21              | 5.722 (df=8)              | .68  | 6.545 (df=8)               | .59  | 5.533 (df=4)                         | .24  | 7.682 (df=4)               | .10  |
| A22              | 8.624 (df=8)              | .38  | 10.697 (df=8)              | .22  | 10.980 (df=4)                        | .03  | 8.786 (df=4)               | .07  |
| A23              | 6.123 (df=8)              | .63  | 8.263 (df=8)               | .41  | 8.126 (df=4)                         | .09  | 3.311 (df=4)               | .51  |
| A24              | 8.322 (df=8)              | .40  | 10.941 (df=8)              | .21  | 9.336 (df=4)                         | .05  | 4.624 (df=4)               | .33  |
| A25              | 1.706 (df=8)              | .99  | 1.750 (df=8)               | .99  | 12.758 (df=4)                        | .01  | 4.738 (df=4)               | .32  |
| A26              | 7.860 (df=8)              | .45  | 9.076 (df=8)               | .34  | 12.408 (df=4)                        | .02  | 6.853 (df=4)               | .14  |
| A27              | 4.945 (df=8)              | .76  | 5.071 (df=8)               | .75  | 7.380 (df=4)                         | .12  | 0.046 (df=4)               | .99  |
| A28              | 9.449 (df=8)              | .31  | 11.773 (df=8)              | .16  | 4.529 (df=4)                         | .34  | 0.641 (df=4)               | .96  |
| A29              | 4.685 (df=8)              | .79  | 5.885 (df=8)               | .66  | 10.087 (df=4)                        | .04  | 9.267 (df=4)               | .06  |
| A30              | 3.534 (df=8)              | .90  | 4.388 (df=8)               | .82  | 8.214 (df=4)                         | .08  | 9.377 (df=4)               | .05  |
| A31              | 8.655 (df=8)              | .37  | 9.083 (df=8)               | .34  | 3.617 (df=4)                         | .46  | 0.888 (df=4)               | .93  |
| A32 <sup>a</sup> | 14.383 (df=8)             | .07  | 15.852 (df=8)              | .045 | Excluded from the predictor analysis |      |                            |      |
| A33              | 15.154 (df=8)             | .06  | 12.196 (df=8)              | .14  | 4.884 (df=4)                         | .30  | 1.490 (df=4)               | .83  |
| A34              | 10.925 (df=8)             | .21  | 7.264 (df=8)               | .51  | 2.694 (df=4)                         | .61  | 1.637 (df=4)               | .80  |
| A35              | 2.851 (df=8)              | .94  | 3.185 (df=8)               | .92  | 10.842 (df=4)                        | .03  | 2.683 (df=4)               | .61  |
| A36              | 3.313 (df=8)              | .91  | 4.208 (df=8)               | .84  | 6.788 (df=4)                         | .15  | 5.435 (df=4)               | .25  |
| A37              | 6.470 (df=8)              | .60  | 6.925 (df=8)               | .55  | 6.695 (df=4)                         | .15  | 5.687 (df=4)               | .22  |
| A38              | 2.719 (df=8)              | .95  | 2.964 (df=8)               | .94  | 7.307 (df=4)                         | .12  | 4.761 (df=4)               | .31  |
| A39              | 7.736 (df=8)              | .46  | 7.889 (df=8)               | .44  | 5.907 (df=4)                         | .21  | 2.722 (df=4)               | .61  |
| A40              | 3.053 (df=8)              | .93  | 4.026 (df=8)               | .86  | 7.596 (df=4)                         | .11  | 0.526 (df=4)               | .97  |

|                  |               |     |               |     |                                      |     |              |     |
|------------------|---------------|-----|---------------|-----|--------------------------------------|-----|--------------|-----|
| A41              | 3.246 (df=8)  | .92 | 3.314 (df=8)  | .91 | 11.018 (df=4)                        | .03 | 3.001 (df=4) | .56 |
| A42              | 4.019 (df=8)  | .86 | 4.509 (df=8)  | .81 | 6.234 (df=4)                         | .18 | 4.731 (df=4) | .32 |
| A43 <sup>a</sup> | 14.061 (df=8) | .08 | 17.197 (df=8) | .03 | Excluded from the predictor analysis |     |              |     |
| A44              | 12.063 (df=8) | .15 | 13.154 (df=8) | .11 | 5.860 (df=4)                         | .21 | 1.058 (df=4) | .90 |
| A45              | 3.066 (df=8)  | .93 | 3.308 (df=8)  | .91 | 11.466 (df=4)                        | .02 | 2.782 (df=4) | .60 |
| A46              | 12.795 (df=8) | .12 | 11.603 (df=8) | .17 | 3.783 (df=4)                         | .44 | 3.499 (df=4) | .48 |
| A47              | 12.326 (df=8) | .14 | 11.480 (df=8) | .18 | 7.837 (df=4)                         | .10 | 3.120 (df=4) | .54 |
| A48              | 11.999 (df=8) | .15 | 8.755 (df=8)  | .36 | 13.363 (df=4)                        | .01 | 2.542 (df=4) | .64 |
| A49              | 14.874 (df=8) | .06 | 11.456 (df=8) | .18 | 9.021 (df=4)                         | .06 | 2.924 (df=4) | .57 |
| A50              | 9.992 (df=8)  | .27 | 10.091 (df=8) | .26 | 5.034 (df=4)                         | .28 | 4.169 (df=4) | .38 |
| A51              | 6.258 (df=8)  | .62 | 5.785 (df=8)  | .67 | 4.564 (df=4)                         | .34 | 1.963 (df=4) | .74 |
| A52              | 6.944 (df=8)  | .54 | 7.165 (df=8)  | .52 | 8.235 (df=4)                         | .08 | 2.509 (df=4) | .64 |

<sup>a</sup> Excluded from subsequent analysis due to inappropriate modeling fitting.
